# Supplementary material for: Whole exome-seq and RNA-seq data reveal unique neoantigen profiles in Kenyan breast cancer patients
Source: PubMed Central journal article supplement (PMC11668681; doi:10.3389/fonc.2024.1444327), 2024-12-11

**A**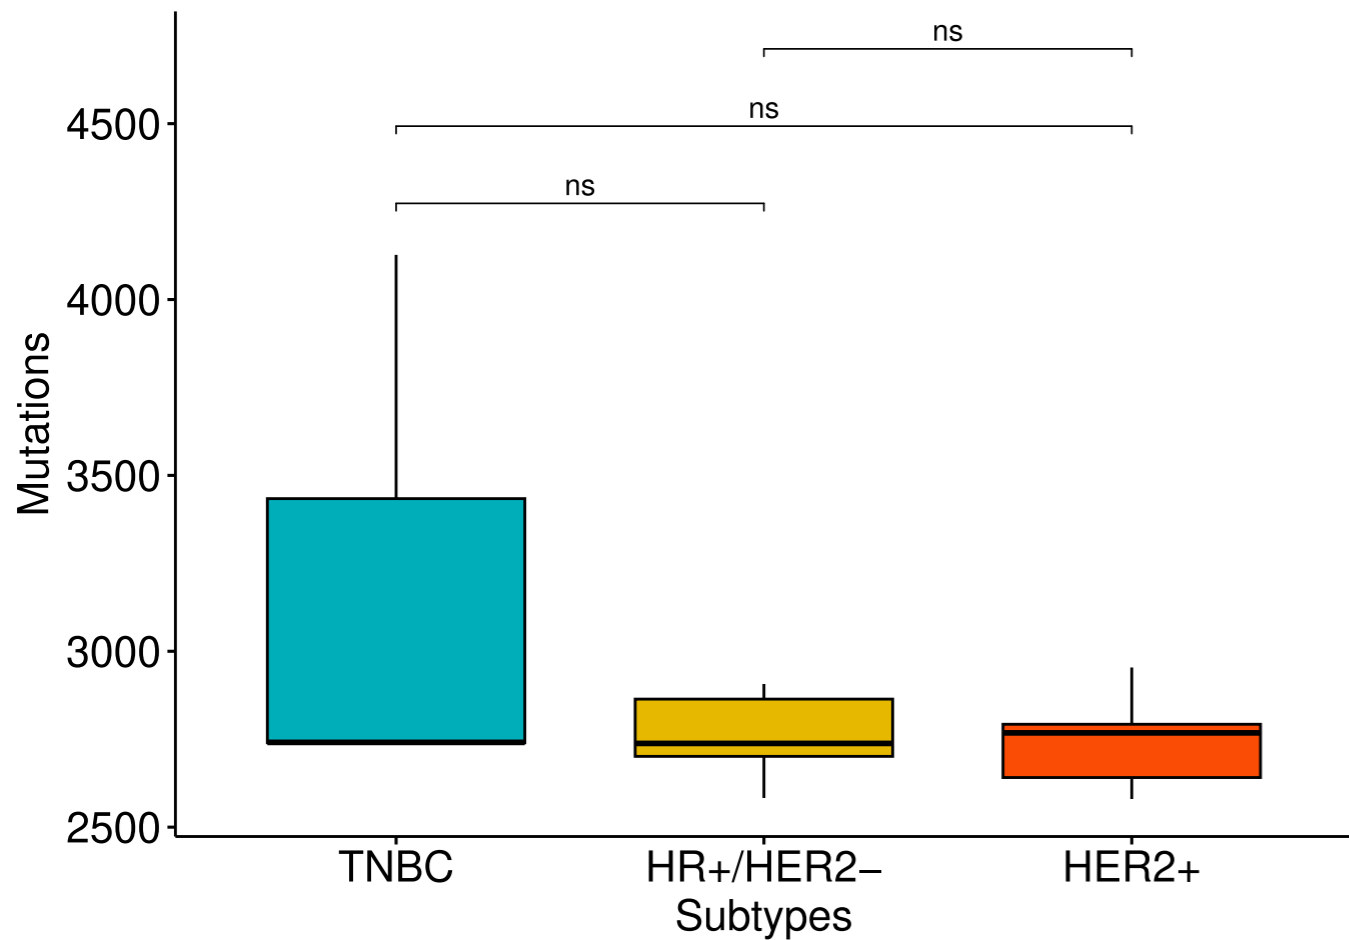**B**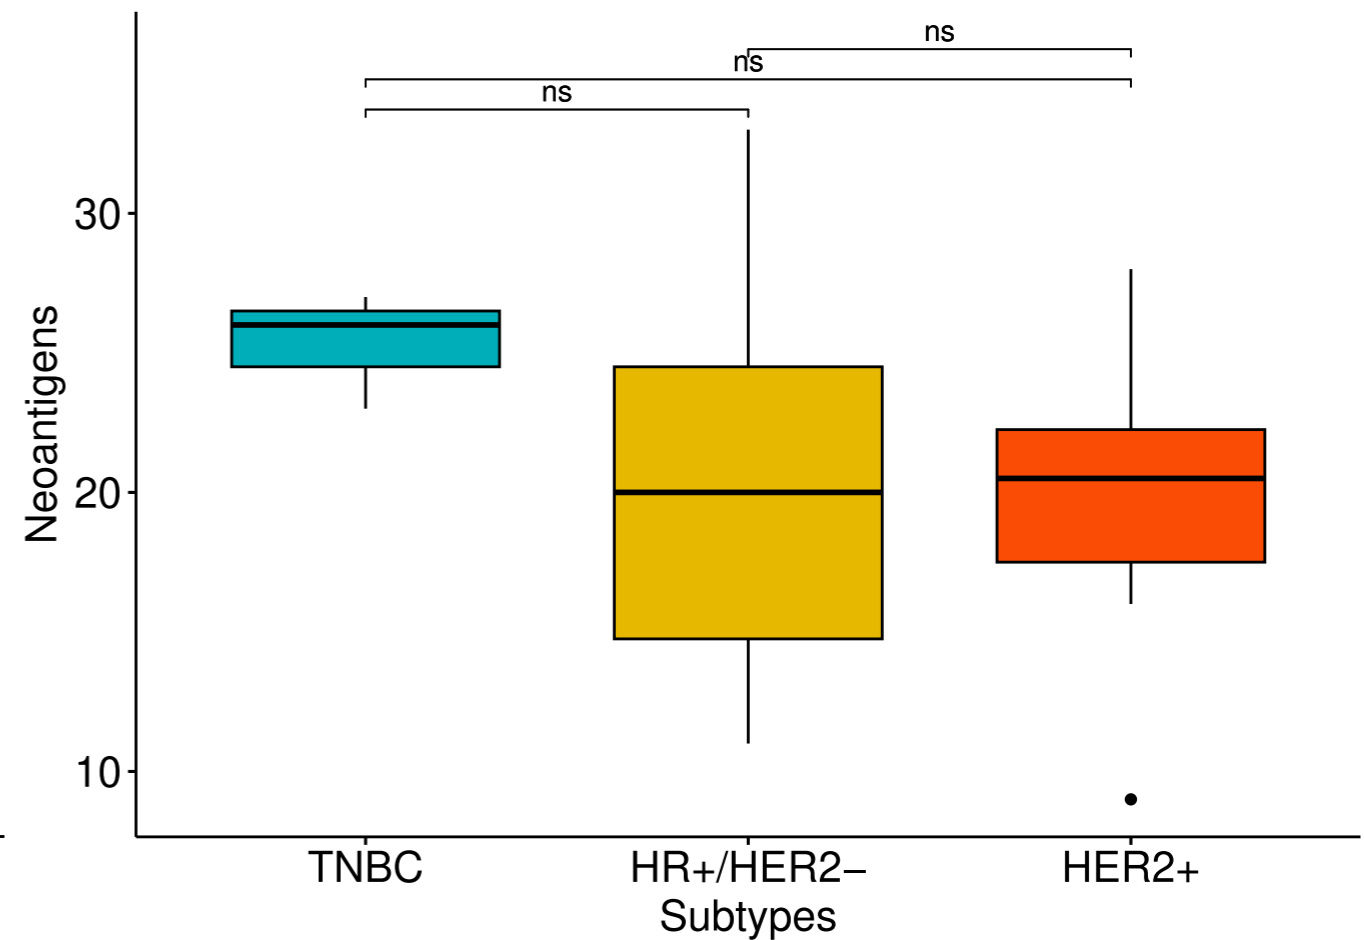

Supplement: Image1.pdf [file Image1.pdf]
